# Supplementary material for: Self-supported Ni3S2@Ni2P/MoS2 heterostructures on nickel foam for an outstanding oxygen evolution reaction and efficient overall water splitting
Source: Royal Society of Chemistry journal article supplement (doi:10.1039/d1dt03023j), 2021-01-01
Supplement: d1dt03023j1.pdf [file d1dt03023j1.pdf]

## Electronic Supplementary Information

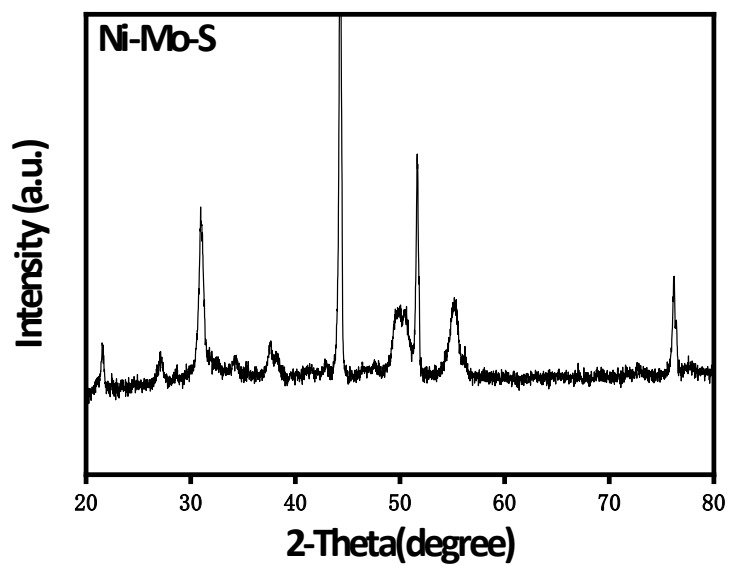

Fig. S1. XRD patterns of Ni-Mo-S/NF ;

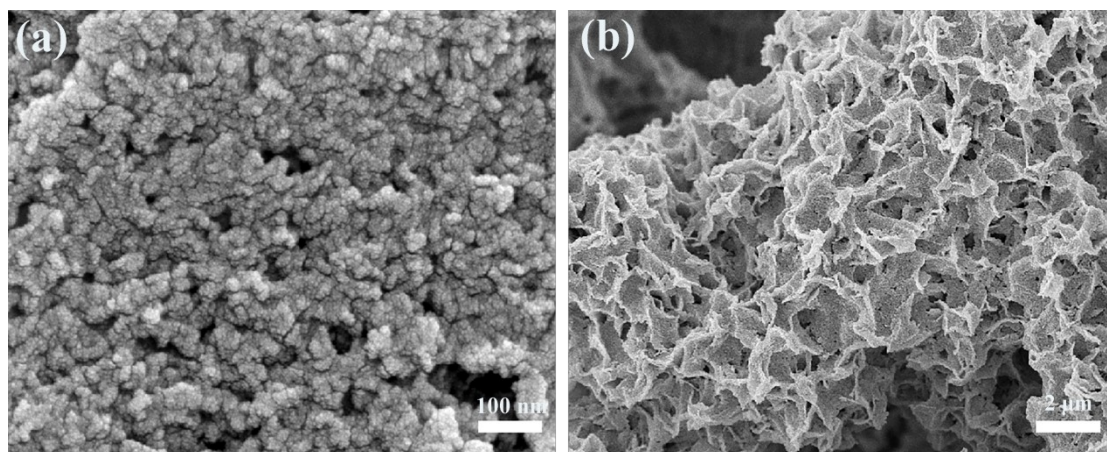

Fig. S2. (a-b) SEM images of Ni-Mo-S/NF;

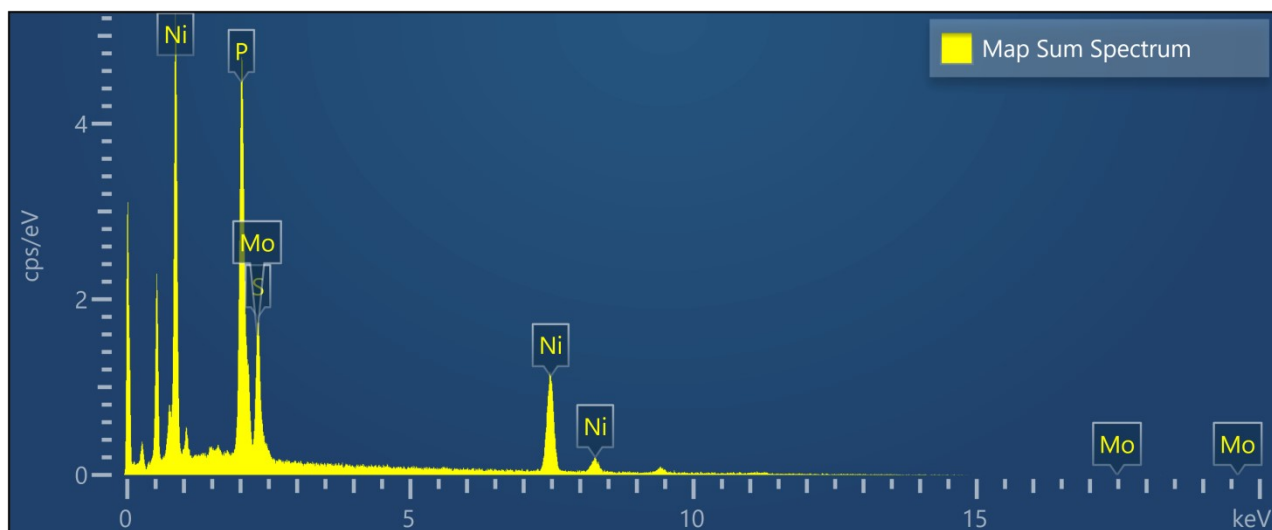

Fig. S3. EDS spectrum of  $\text{Ni}_3\text{S}_2@\text{Ni}_2\text{P}/\text{MoS}_2/\text{NF}$ .

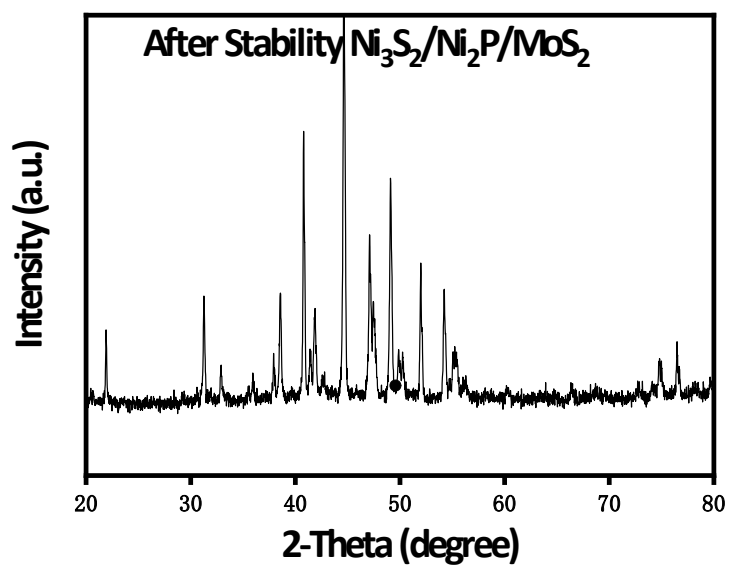

Fig. S4. XRD pattern of  $\text{Ni}_3\text{S}_2@\text{Ni}_2\text{P}/\text{MoS}_2/\text{NF}$  after stability measure.

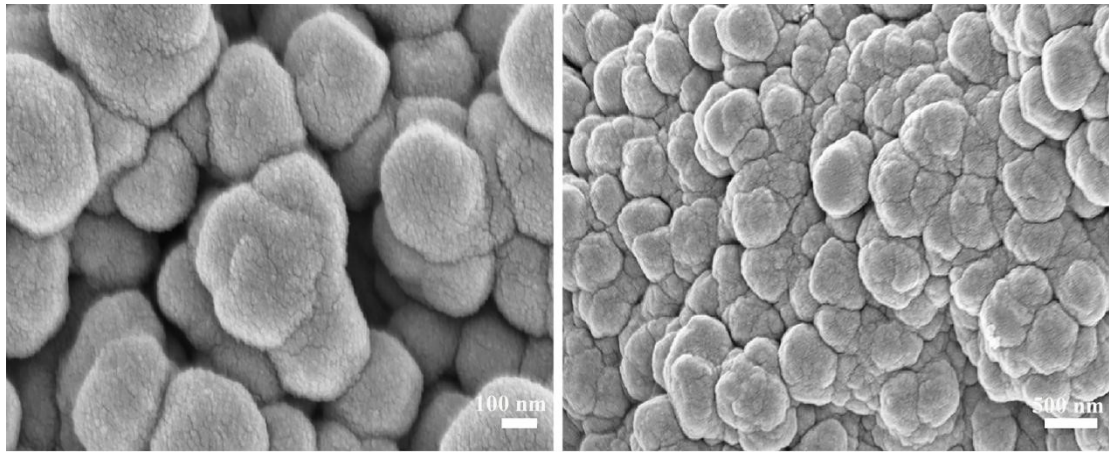

**Fig. S5.** SEM images of  $\text{Ni}_3\text{S}_2@\text{Ni}_2\text{P}/\text{MoS}_2/\text{NF}$  after 40h stability test.

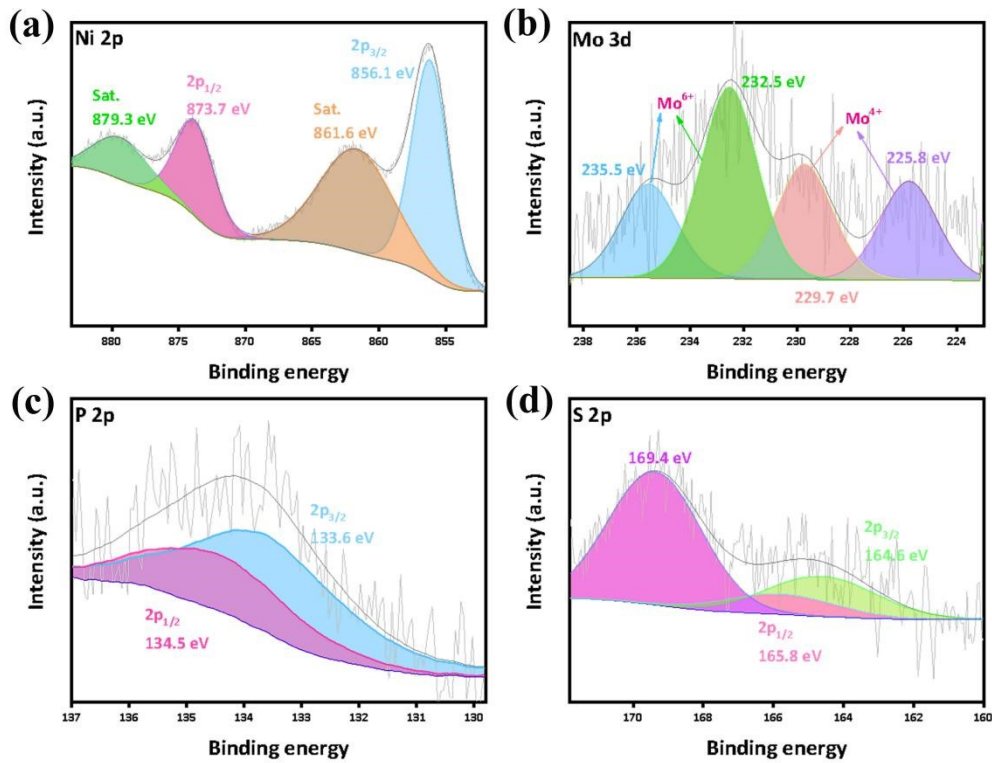

**Fig. S6.** XPS survey spectra of  $\text{Ni}_3\text{S}_2@\text{Ni}_2\text{P}/\text{MoS}_2/\text{NF}$  in (a) Ni 2p region (b) Mo 3d region (c) P 2p region and (d) S 2p region after OER stability test.

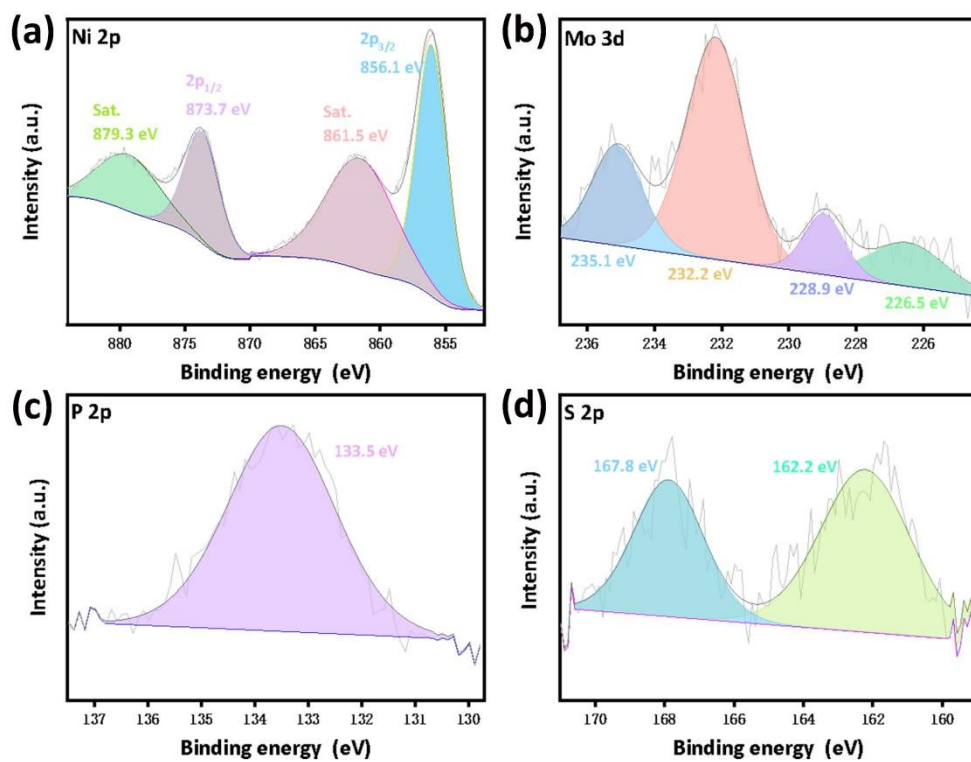

**Fig. S7.** XPS survey spectra of Ni<sub>3</sub>S<sub>2</sub>@Ni<sub>2</sub>P/MoS<sub>2</sub>/NF in (a) Ni 2p region (b) Mo 3d region (c) P 2p region and (d) S 2p region after HER stability test.

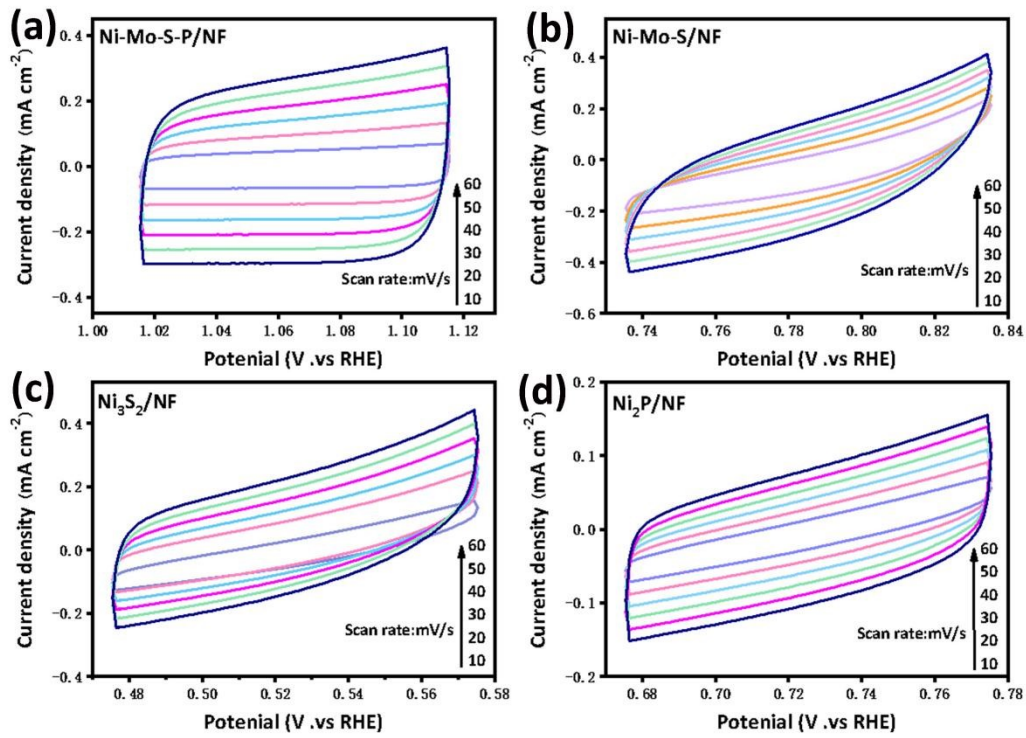

**Fig. S8.** CV images within scan rate of 10~60 mV/s of Ni<sub>3</sub>S<sub>2</sub>@Ni<sub>2</sub>P/MoS<sub>2</sub>/NF, Ni-Mo-P/NF, Ni<sub>3</sub>S<sub>2</sub>/NF and Ni<sub>2</sub>P/NF electrocatalysts.

Calculation of ECSA for each catalyst:

$$ECSA = C_{dl}/C_s$$

$$ECSA_{Ni_3S_2@Ni_2P/MoS_2} = 4.5 \text{ mF cm}^{-2}/40 \text{ } \mu\text{F cm}^{-2} = 112.5 \text{ cm}^{-2}_{ECSA}$$

$$ECSA_{Ni-Mo-S} = 3 \text{ mF cm}^{-2}/40 \text{ } \mu\text{F cm}^{-2} = 75 \text{ cm}^{-2}_{ECSA}$$

$$ECSA_{Ni_3S_2} = 2.8 \text{ mF cm}^{-2}/40 \text{ } \mu\text{F cm}^{-2} = 70 \text{ cm}^{-2}_{ECSA}$$

$$ECSA_{Ni_2P} = 1.8 \text{ mF cm}^{-2}/40 \text{ } \mu\text{F cm}^{-2} = 45 \text{ cm}^{-2}_{ECSA}$$

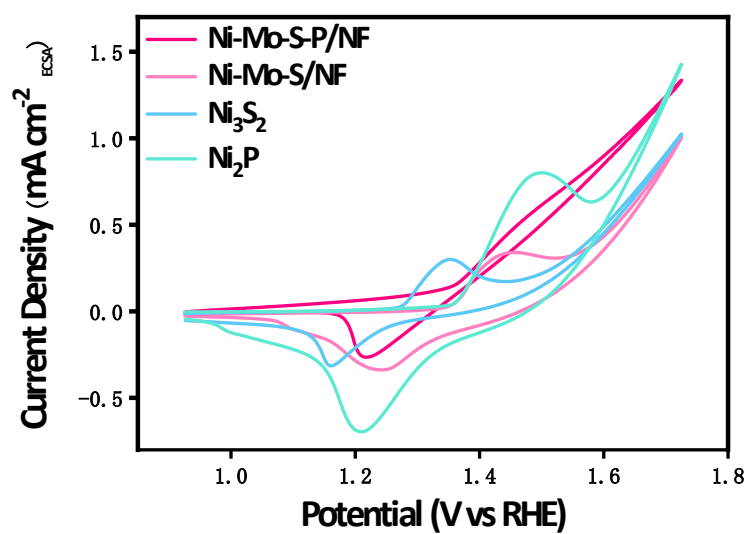

**Fig. S9.** OER polarization curves normalized for the ECSA of the studied catalysts in 1 M KOH.

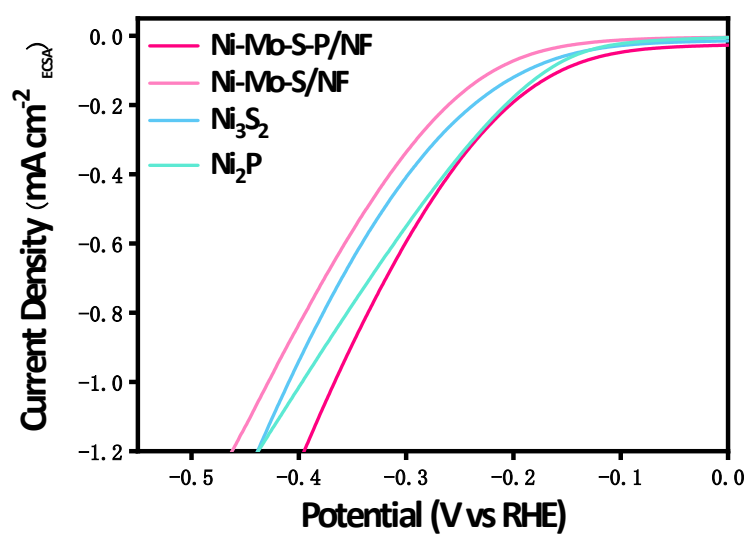

**Fig. S10.** HER polarization curves normalized for the ECSA of the studied catalysts in 1 M KOH.

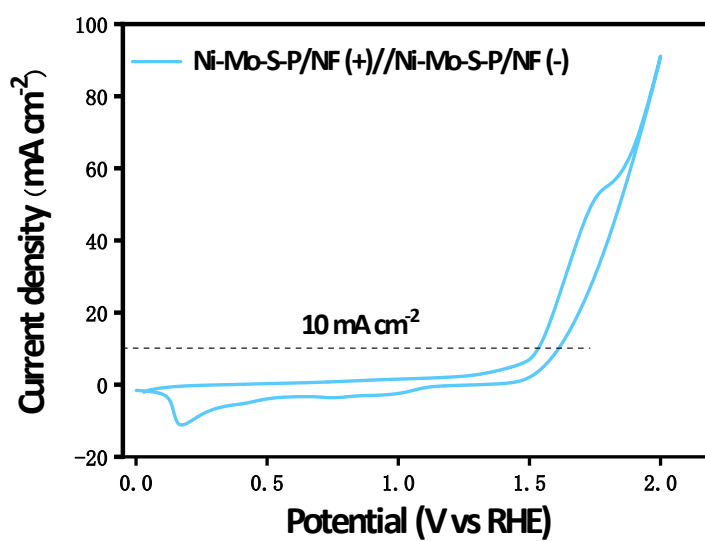

**Fig. S11.** Polarization curves of Ni-Mo-P-S/NF in 1.0 M KOH for overall water

splitting.

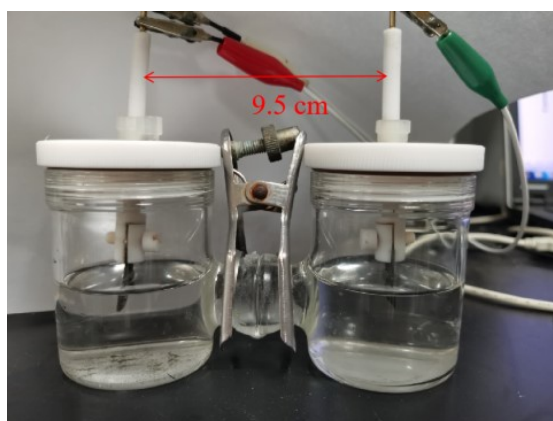

**Fig. S12.** Picture of Ni-Mo-P-S/NF as cathode and anode for overall water splitting.
